# Supplementary material
Source: publisher figshare collection journal article supplement (https://gsapubs.figshare.com/ndownloader/files/23291276)
Supplement: Supplementary file 1 [file 23291276]

## **Supplementary materials for "Geologic versus geodetic deformation adjacent to the San Andreas fault, central California"**

by S. Titus et al., revised for Geological Society of America Bulletin, February, 2010.

### **Summary**

This supplementary document provides additional information about all of the GPS station velocities used in this study. Our description of the station velocities is sub-divided into sites located in undeforming areas of the Sierra Nevada-Great Valley block (SNGV), sites located on the Pacific plate, and sites located within deforming areas adjacent to the San Andreas fault.

### **GPS data processing**

All station velocities used in this study were determined from GIPSY-OASIS II analysis at the University of Wisconsin-Madison of the original GPS code-phase data. Daily station positions through May 10 of 2009 were determined using release 4.02 of GIPSY and satellite products from the Jet Propulsion Laboratory. The latter consist of the standard non-fiducial (*e.g.* \*\_nf.eci, \*\_nf.tdpc, etc...) files produced by JPL between the 1990s and mid-2009. The satellite products do not include the newer generation orbits from JPL that have been generated since early 2009 and which are meant for use with release 5.0 of GIPSY.

Best-fitting slopes, intercepts, and antenna offsets were estimated from inversions of the coordinate time series for all sites, with additional corrections (described below) at some sites to reduce the influence of coseismic and postseismic motion from the 2003 San Simeon and 2004 Parkfield earthquakes on their velocity estimates.

All of the GPS station locations are specified in ITRF2005 (Altamimi et al. 2007). Following Argus (2007), we adopt the Earth's center-of-mass as the appropriate origin for geodetically described plate motions. Argus (2007) estimates that Earth's center-of-mass moves relative to the ITRF2005 geocenter at respective rates of  $0.3 \text{ mm yr}^{-1}$ ,  $0.0 \text{ mm yr}^{-1}$ , and  $1.2 \text{ mm yr}^{-1}$  in the X, Y, and Z directions. Opposite-sense corrections are therefore made to all of the GPS station velocities to offset the motion of ITRF2005 relative to the Earth's center-of-mass.

### **Sierra Nevada-Great Valley block motion**

Figure 1 shows the locations of the 32 GPS stations we used to estimate the angular velocity of the Sierra Nevada-Great Valley (SNGV) block relative to ITRF2005. We identified 32 continuous stations from nominally stable areas of the SNGV block (shown by the red arrows in Fig. 1) and inverted their velocities (given in Table 1) to estimate the angular velocity for the SNGV block relative to ITRF2005. The best-fitting angular velocity, given in Table 1 of the main manuscript, fits the 32 station velocities well (Figure 1), with reduced chi-square of 1.3 and weighted mean residual motions of  $0.64 \text{ mm yr}^{-1}$  and  $0.68 \text{ mm yr}^{-1}$  in the north and east velocity components, respectively. The misfits to the station velocities are only slightly larger (by 10%) than the estimated velocity uncertainties.

### **Pacific plate motion**

We estimate the angular velocity of the Pacific plate relative to ITRF2005 from the velocities of 27 stations (Figure 2 and Table 2). Absent any compelling evidence for deformation within the Pacific plate, we used as many station velocities as possible, including three sites from the eastern Pacific basin (GUAX, CLAR, and SOCC), and stations in the southern, western, and central Pa-

cific. Twenty-five of the 27 stations are continuous (Table 2). Data from campaign sites CLAR and SOCC in the eastern Pacific (Marquez-Azua et al. 2004) span 3.1 years and 7.3 years, respectively.

The best-fitting Pacific plate angular velocity (in Table 1 of the main manuscript) fits the 27 station velocities well, with weighted mean residual motions of  $0.71 \text{ mm yr}^{-1}$  and  $0.94 \text{ mm yr}^{-1}$  in the north and east components, respectively. These compare well with previously reported misfits for Pacific plate station velocities (Beavan et al. 2002; Plattner et al. 2007). Reduced chi-square for the 27 Pacific plate station velocities is 2.0, indicating that the velocity misfits exceed their uncertainties by 40% on average. Although the higher than expected misfits could be evidence for internal deformation of the Pacific plate, the WRMS values for the Pacific plate station velocities are only modestly higher than for other plates with abundant GPS station velocities. We thus suspect that the station velocity uncertainties are modestly under-estimated.

The wide geographic area spanned by the 27 station velocities imposes strong constraints on the angular velocity, as has been the case for previous studies. For example, our best-fitting pole ( $63.5^\circ\text{S}$ ,  $110.7^\circ\text{E}$ ) lies within 0.5 angular degrees of poles estimated by Beavan et al. (2002) and Plattner et al. (2007) even though all three Pacific plate angular velocity estimates are referenced to different versions of the international terrestrial reference frame. The preferred Pacific plate angular velocities for the three studies predict Pacific plate motion that differs by only fractions of a  $\text{mm yr}^{-1}$  within the study area in central California, too small to affect any of the results or conclusions reached herein.

### **Deforming areas adjacent to the San Andreas fault**

Table 3 gives the motions of the 150 stations from the study area in central California and Figure 3 shows their residual velocities in reference frames fixed to the Pacific plate and SNGV block. Below, we use the time series of two continuous stations from the study area to illustrate the effects of the  $M_w=6.6$  December 22, 2003 San Simeon and  $M_w=6.2$  September 28, 2004 Parkfield earthquakes on deformation in the study area and to illustrate our procedures for reducing the effect of these two earthquakes on our estimates of the interseismic station velocities.

### **GPS station velocities: Central California**

Station QCYN, which is located 25 km southwest of the creeping segment of the San Andreas fault and 50 km or farther from the epicenters of both the San Simeon and Parkfield earthquakes, moved southward by 11 mm and westward by 3 mm during the 2003 San Simeon earthquake (Fig. 4), consistent with the coseismic elastic deformation associated with this earthquake (Rolandone et al. 2006). During the months following the earthquake, QCYN moved an additional 2-3 mm to the south (Figs. 4 and 5), but appears to have resumed its steady interseismic motion by the middle of 2004. During the 2004 Parkfield earthquake, the coseismic motion at QCYN was only 3 millimeters to the north and west, near the lower detection limit for this station.

An inversion of the daily station positions at QCYN to estimate the slopes and intercepts that best describe the north and east components of the station motion before the San Simeon earthquake and after mid-2004 gives best slopes of  $4.9 \text{ mm yr}^{-1}$  to the south and  $1.7 \text{ mm yr}^{-1}$  to the east after removing Pacific plate motion (Fig. 5). In contrast, an inversion of the daily positions from January 1, 2007 to mid-2009, several years after both earthquakes occurred, gives best slopes of  $5.3 \text{ mm yr}^{-1}$  to the south and  $1.3 \text{ mm yr}^{-1}$  to the east after removing Pacific plate motion (Fig. 6). The difference in the station velocities for these two time intervals is only  $0.6 \text{ mm yr}^{-1}$ , smaller than their  $\pm 1.2 \text{ mm yr}^{-1}$  combined 1- $\sigma$  uncertainty. Any change in the velocity at QCYN due to postseismic effects of the San Simeon and Parkfield earthquakes is thus too small to detect.

Station PKDB is located southwest of the San Andreas fault and 20 km from the epicenter of the 2004 Parkfield earthquake. The station exhibits significantly larger coseismic and postseismic responses to the San Simeon and Parkfield earthquakes than does station QCYN (Figure 7). A visual examination of the station time series indicates that the 2004 Parkfield earthquake triggered a protracted postseismic response that affected the station motion for years after the earthquake, possibly to the present (Figure 8). Our inversion to estimate the best long-term rate at this site therefore excludes all station positions from Dec. 22, 2003 to the start of 2007, by which time most of the postseismic motion from the 2004 Parkfield earthquake appears to have occurred. The remaining station positions, extending from 1996 to mid-2009 are best fit by rates of  $6.6 \text{ mm yr}^{-1}$  to the south and  $6.9 \text{ mm yr}^{-1}$  to the east after removing Pacific plate motion (Figure 8).

Given our concern that slow postseismic motion continued to affect the motion at station PKDB after early 2007 (Figure 9), we inverted the station positions for the period from early 2007 to mid-2009 to estimate the station velocity. The best-fitting station velocity is  $2.1 \text{ mm yr}^{-1}$  faster than, but parallel to, the longer-term average rate described above. The speed-up in station motion is consistent with the large amount of afterslip observed after the 2004 Parkfield earthquake (Johanson et al. 2006) and strongly suggests that afterslip continued to affect the secular, interseismic velocity field near Parkfield after 2007.

We also analyzed the position time series (not shown) for station CRBT, which is located midway between the San Simeon and Parkfield earthquakes at respective distances of 33 km and 35 km from their epicenters. Encouragingly, the long-term rate we determine from a joint inversion of the station positions for the periods mid-2001 to Dec. 22, 2003 and Jan. 1, 2007 to mid-2009 differs by only  $0.6 \text{ mm yr}^{-1}$  from the rate we determined for the period Jan. 1, 2007 to mid-2009. The small difference once again suggests that any bias in our estimate of the long-term station rate due to postseismic motions associated with either of these earthquakes is small.

A rigorous treatment of the postseismic effects of the San Simeon and 2004 Parkfield earthquakes at all stations in central California is beyond the scope of this work. As is described below, we estimated and applied corrections for the coseismic and postseismic effects of these two earthquakes at all the continuous and campaign sites in our study area. Our analysis of the motion at station PKDB suggests that biases in the velocities of stations within 20 km of one or both of those rupture zones could be as large as several  $\text{mm yr}^{-1}$  despite our attempt to estimate and correct for the postseismic effects of the earthquakes. Caution is thus warranted in interpreting the motions of stations near the Parkfield rupture zone and possibly the San Simeon rupture zone in the context of long-term deformation. In contrast, our analyses of the motions at stations QCYN and CRBT, which are located 30 km or farther from the epicenters of the San Simeon and 2004 Parkfield earthquakes, reveal no measurable, protracted postseismic effect from either earthquake. Our estimates of the interseismic motions of most stations located 30 km or farther from the two rupture zones are thus likely to be accurate to within  $1 \text{ mm yr}^{-1}$ , absent other significant sources of error in their velocity estimates.

### **Continuous station velocity estimates**

We determined long-term interseismic velocities of continuous GPS stations in central California from inversions of their daily station positions, including estimates of the magnitude of any antenna offsets. Data from the time of the San Simeon earthquake (Dec. 22, 2003) until no sooner than mid-2004 and no later than Dec. 31, 2006 were excluded from the inversion to minimize the coseismic and postseismic effects of the San Simeon and Parkfield earthquakes.

### Campaign stations:

At each of our campaign sites, we applied corrections to the station position time series using elastic displacements calculated from the best-fitting distributions of coseismic fault-slip and postseismic fault-afterslip for the San Simeon earthquake (Rolandone et al. 2006) and Parkfield earthquake (Johanson et al. 2006). The corrections, shown in Figure 10, range in magnitude from 65 millimeters for stations close to the earthquake rupture zones to only 1-2 millimeters at more distant sites and depend strongly on the location of each station relative to the two earthquake rupture zones.

We assessed the possible effect of these corrections on our campaign site velocity estimates by comparing offsets that we estimated from the time series of five continuous GPS stations in the study area that were operating during both earthquakes (CRBT, GR8V, MEE1, MEE2, and QCYN) to the elastic corrections predicted for the San Simeon and Parkfield earthquakes (Fig. 10). The modeled corrections typically agree with the observed offsets to within 3 millimeters. Given that most of the campaign site observations span time periods of four years or longer (Table 3), the misfits of 3 mm or smaller imply that biases in our estimates of the interseismic site velocities are likely to be  $1 \text{ mm yr}^{-1}$  or less, too small to affect any of our major conclusions. The good agreement between the interseismic velocities we estimate for the campaign sites and those estimated for nearby continuous sites further suggests that both sets of velocities approximate the long-term interseismic deformation in this region.

### References

- Altamimi, Z., Collilieux, X., Legrand, J., Garayt, B., and Boucher, C., 2007, ITRF2005: A new release of the International Terrestrial Reference Frame based on time series of station positions and Earth Orientation parameters *Journal of Geophysical Research*, v. 112, no. B09401, doi:10.1029/2007JB004949.
- Argus, D. F., 2007, Defining the translational velocity of the reference frame of Earth, *Geophysical Journal International* v. 169, p. 830–838, doi: 10.1111/j.1365-246X.2007.03344.x.
- Beavan, J., Tregoning, P., Bevis, M., Kato, T., and Meertens, C., 2002, Motion and rigidity of the Pacific plate and implications for plate boundary deformation, *Journal of Geophysical Research* v. 107 (B10), doi:10.1029/2001JB000282.
- Johanson, I. A., Fielding, E. J., Rolandone, F., and Burgmann, R., 2006, Coseismic and postseismic slip of the 2004 Parkfield earthquake from space-geodetic data, *Bulletin of the Seismological Society of America*, v. 96, S269–S282, doi:10.1785/0120050818.
- Marquez-Azua, B., Cabral-Cano, E., Correa-Mora, F., and DeMets, C., 2004, A model for Mexican neotectonics based on nationwide GPS measurements, 1993–2001, *Geofísica Internacional*, v. 43, p. 319–330.
- Plattner, C., Malservisi, R., Dixon, T. H., LaFemina, P., Sella, G., Fletcher, J., and Vidal-Suarez, F., 2007, New constraints on relative motion between the Pacific plate and Baja California microplate (Mexico) from GPS measurements, *Geophysical Journal International*, v. 170, p. 1373–1380, doi:10.1111/j.1365-246X.2007.03494.x.
- Rolandone, F., Dreger, D., Murray, M., and Burgmann, R., 2006, Coseismic slip distribution of the 2003  $M_w$  6.6 San Simeon earthquake, California, determined from GPS measurements and seismic waveform data, *Geophysical Research Letters*, v. 33, L16315, doi: 10.1029/2006GL027079.

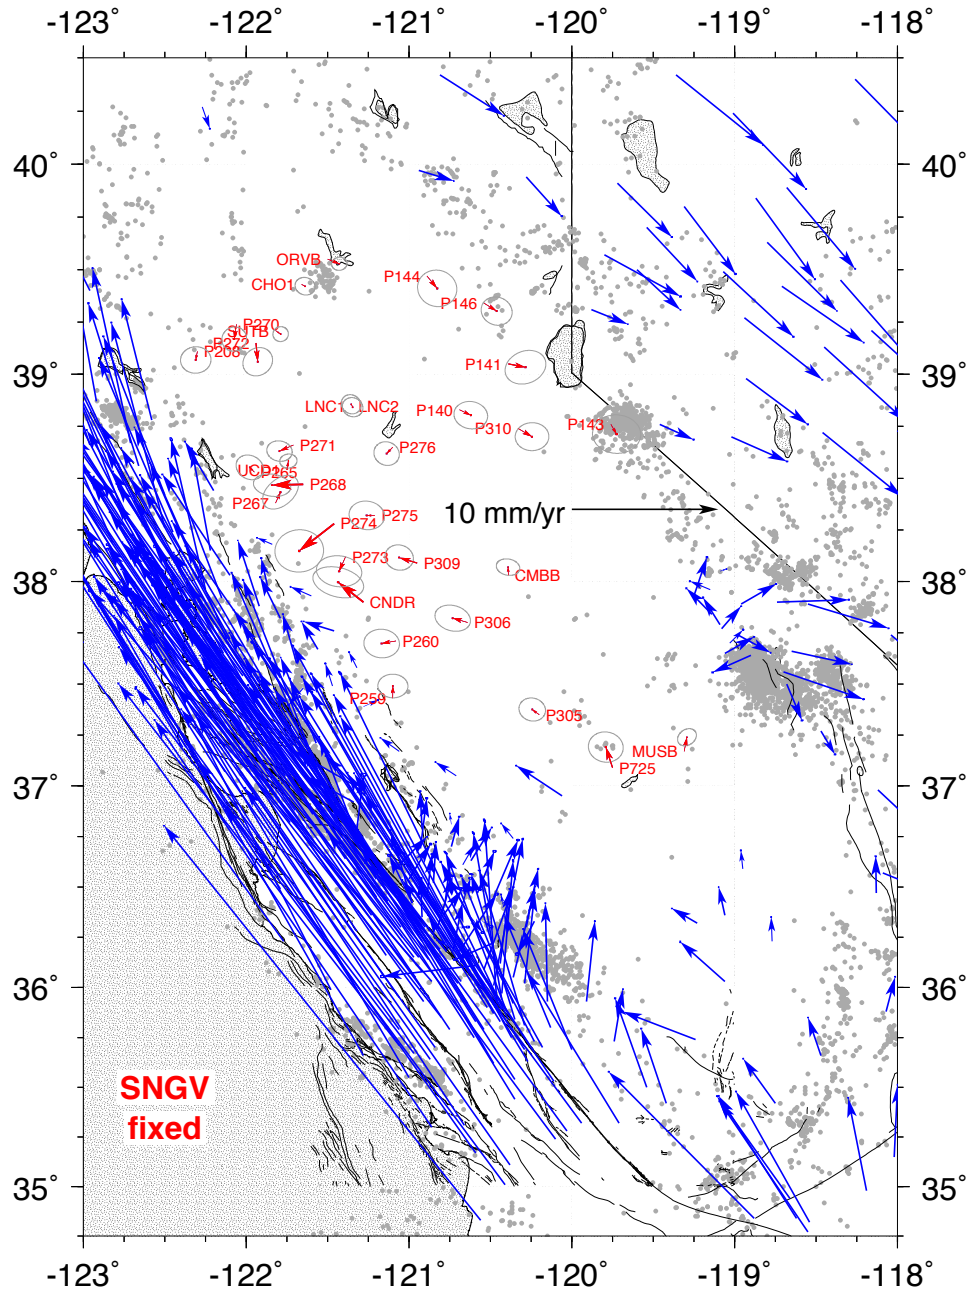

Figure 1: Residual velocities for stations on the Sierra Nevada-Great Valley (SNGV) block (red) and other stations (blue) within the map area after subtracting the velocity predicted by the best-fitting SNGV-ITRF2005 angular velocity given in the text. Uncertainty ellipses are 2-D, 1- $\sigma$ . Each residual site velocity is determined by subtracting the motion predicted at the site by the angular velocity that best describes the motion of the SNGV block relative to ITRF2005 from the site motion measured relative to ITRF2005. All station velocities are corrected for the motion of the geocenter, as described above. Station velocities are given in Table 1.

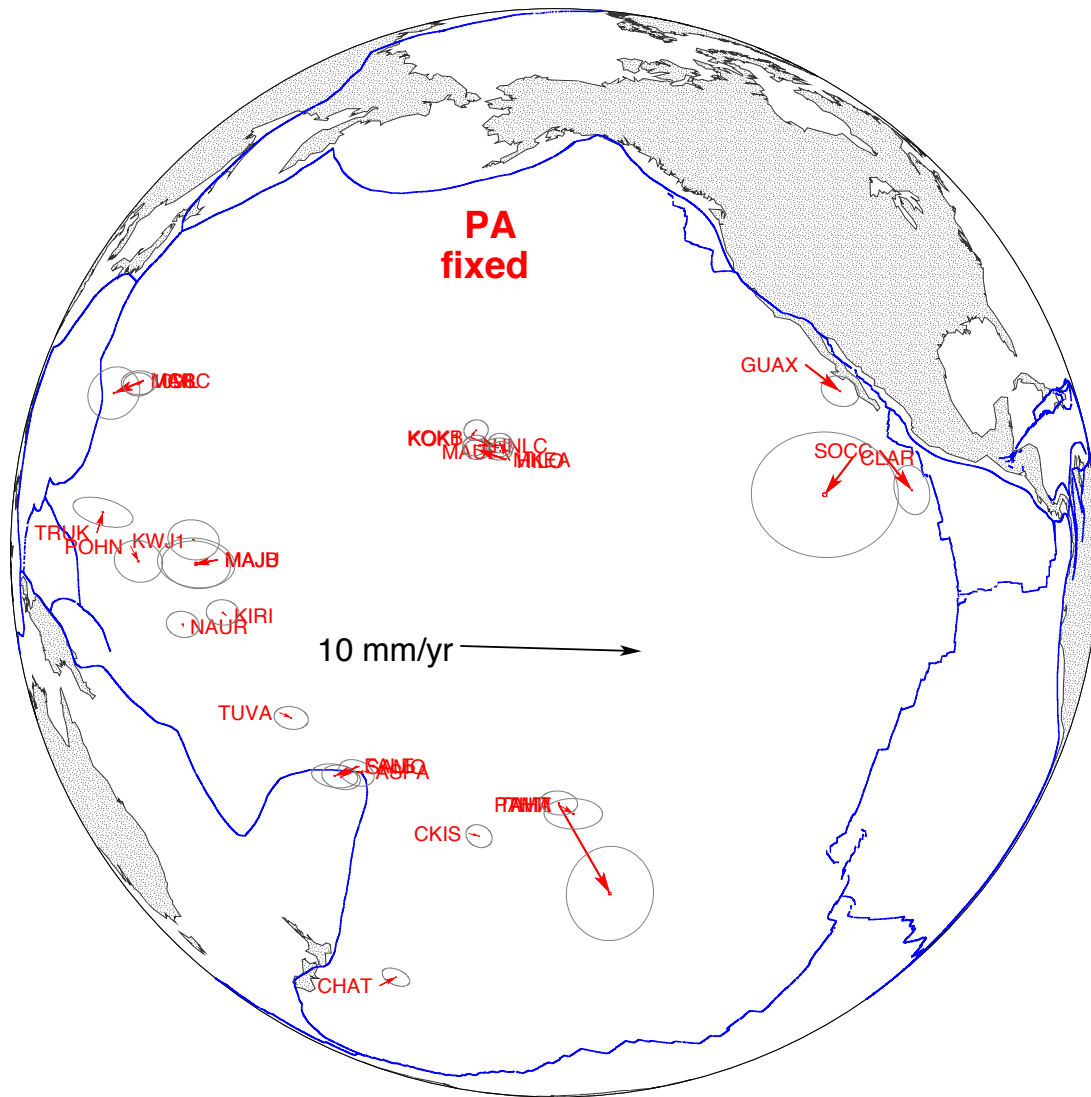

Figure 2: Residual velocities for 27 Pacific plate stations with their 2-D, 1- $\sigma$  uncertainty ellipses. Each residual site velocity is determined by subtracting the linear velocity predicted at the site by the angular velocity that best describes the motion of the Pacific plate relative to ITRF2005 from the site velocity relative to ITRF2005. All station velocities are corrected for the motion of the geocenter, as described in the text. Station velocities are given in Table 2.

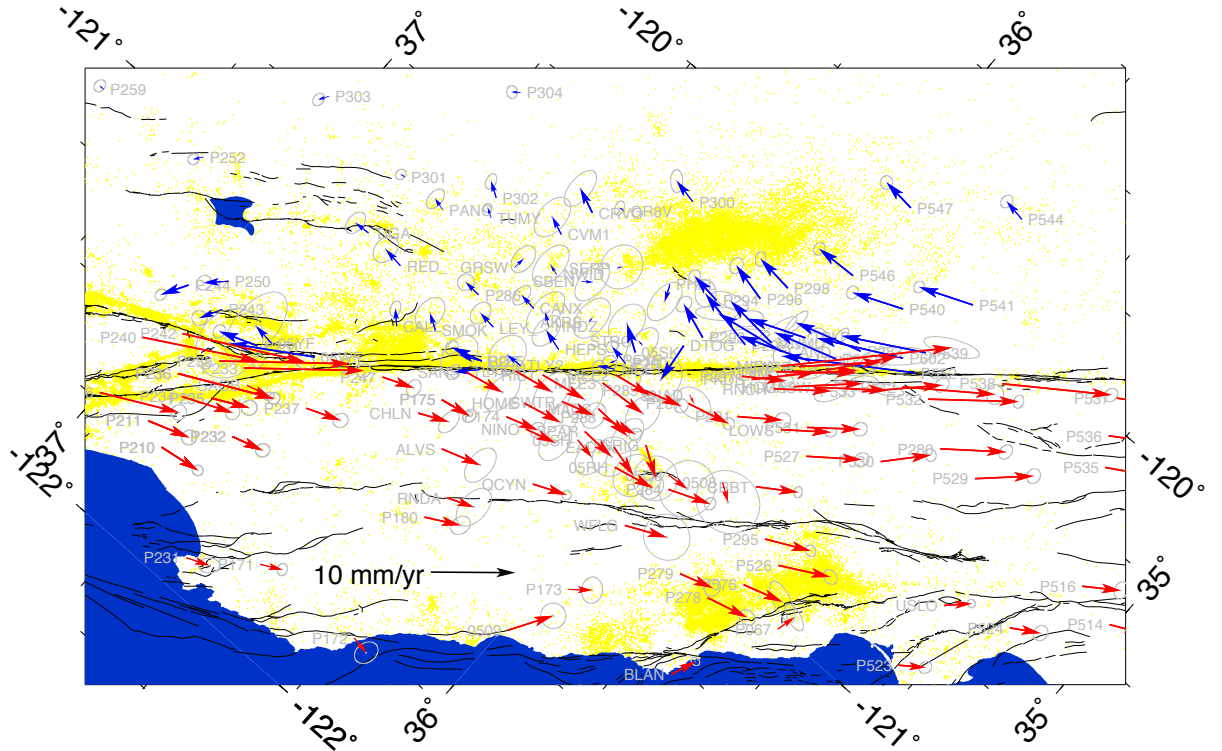

Figure 3: Residual velocities of stations in central California relative to the SNGV block (blue) and Pacific plate (red). Uncertainty ellipses are 2-D, 1- $\sigma$ . The azimuth of the projection equator is N41°W. Residual motions show the measured station motion relative to ITRF2005 reduced by the motion that is predicted by the angular velocity that best describes the motion of the SNGV block relative to ITRF2005. All station velocities are corrected for motion of the ITRF2005 origin relative to Earth's center-of-mass, as described in the text. Earthquakes with magnitude above 1.0 are shown by yellow symbols and are for the period 1972 to 2009. The station velocities relative to ITRF2005 are given in Table 3.

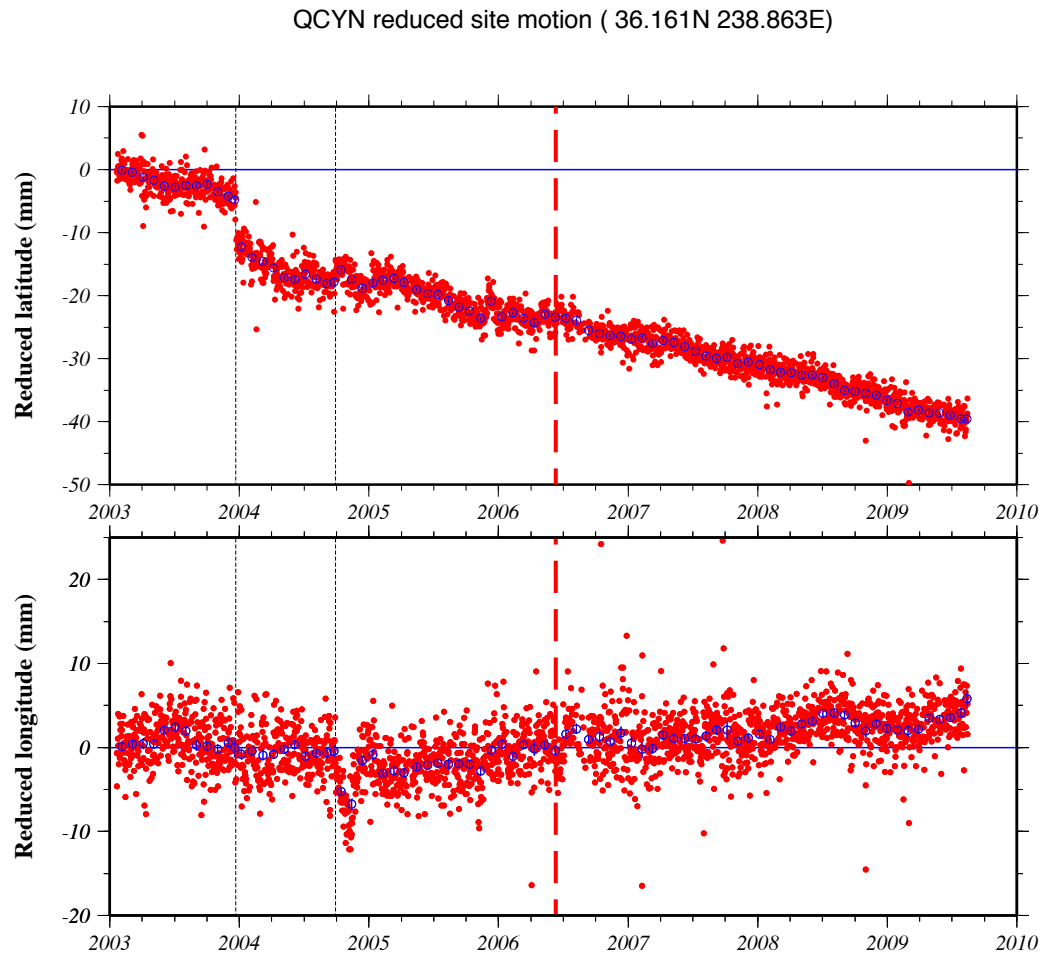

Figure 4: Uncorrected north and east movements of station QCYN adjacent to the central creeping segment of the San Andreas fault in millimeters from 2003 to mid-2009 after removal of Pacific plate motion. Red and blue circles show daily and weekly station position estimates, respectively. No other corrections to the coordinate time series have been made. Dotted vertical lines indicate the times of the Dec. 22, 2003 San Simeon and Sept. 28, 2004 Parkfield earthquakes. Bold red line indicates the time that the GPS monument was moved by several tens of meters to a new monument.



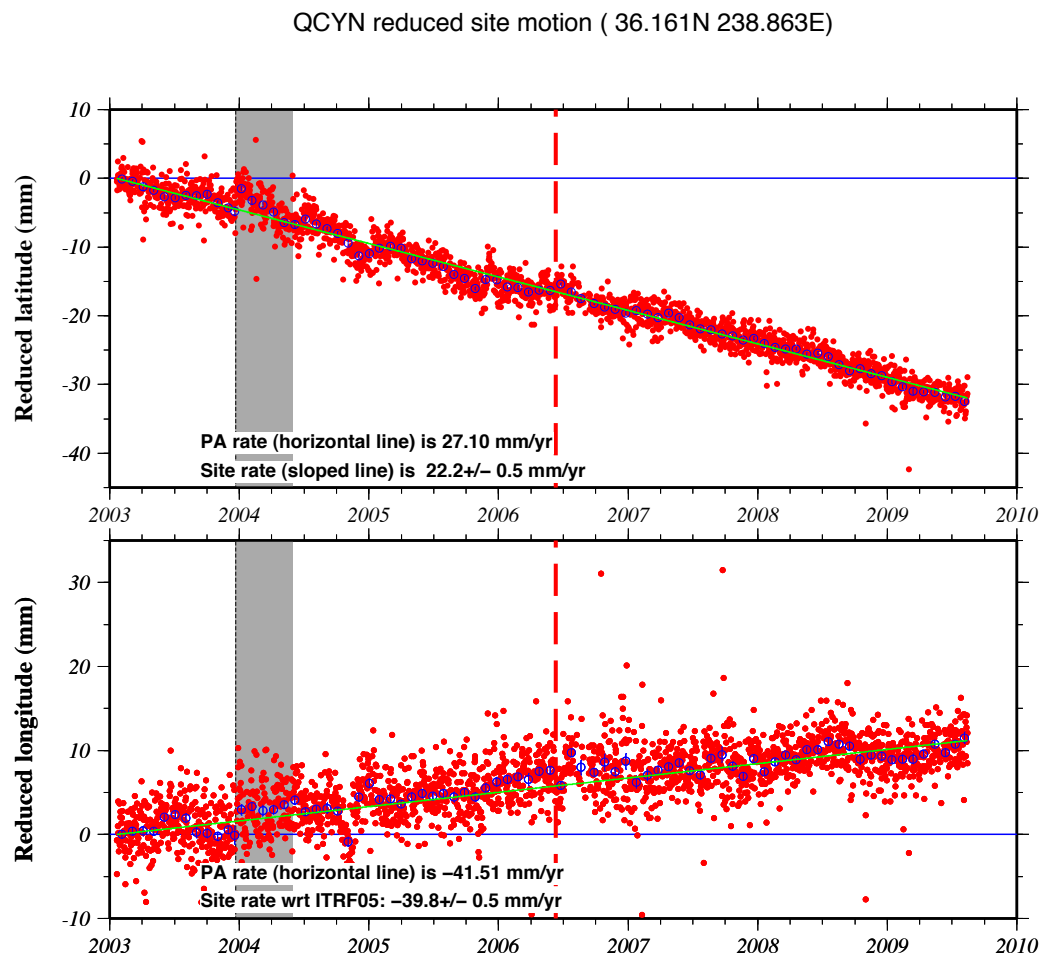

Figure 5: Linear regression of daily station coordinates for station QCYN to find best-fitting slope, intercept, and offsets for the 2003 San Simeon and 2004 Parkfield earthquakes. Pacific plate motion is removed from the station coordinates. Shaded region indicates station positions that are excluded from the determination of the best-fitting slope and intercept. Red and blue circles show daily and weekly station position estimates, respectively. Dotted vertical lines indicate the times of the Dec. 22, 2003 San Simeon and Sept. 28, 2004 Parkfield earthquakes.

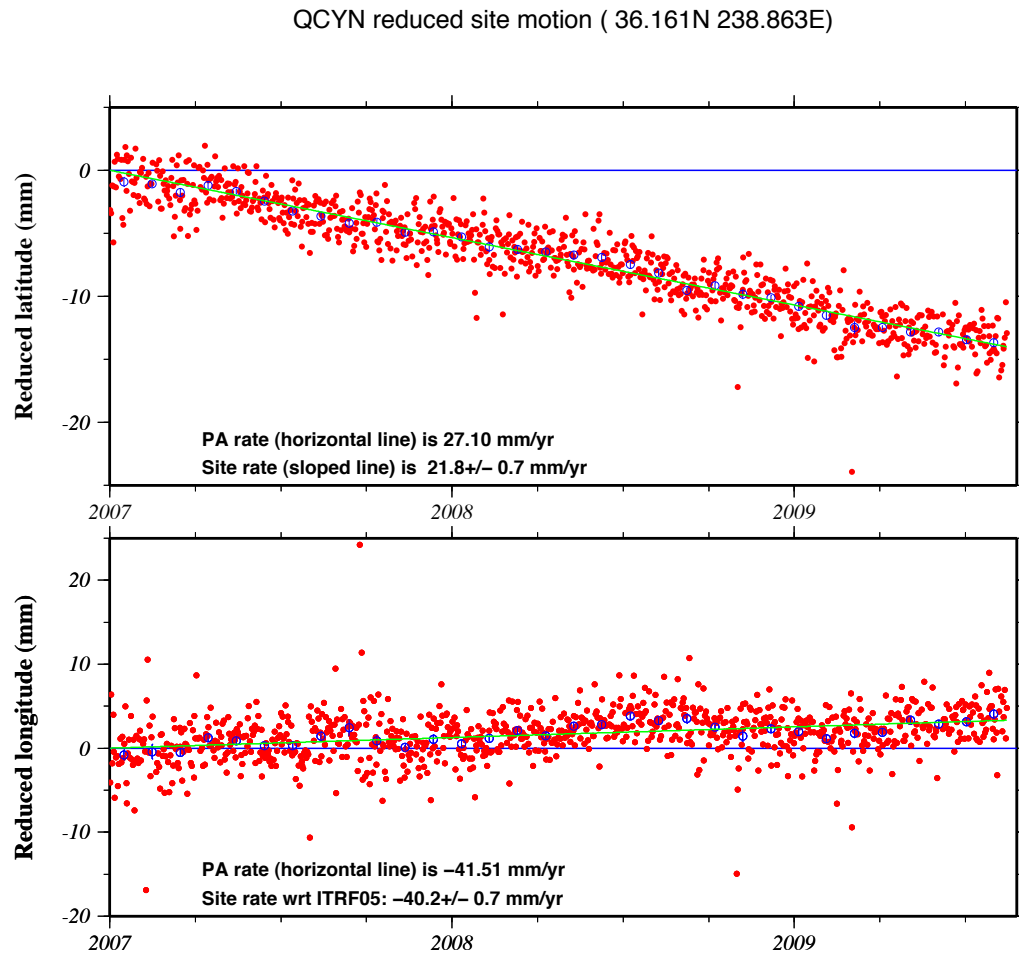

Figure 6: Linear regression of daily station coordinates for the period Jan. 1, 2007 to mid-2009 for station QCYN to find best-fitting slope and intercept. Pacific plate motion is removed from the station coordinates. Red and blue circles show daily and weekly station position estimates, respectively.

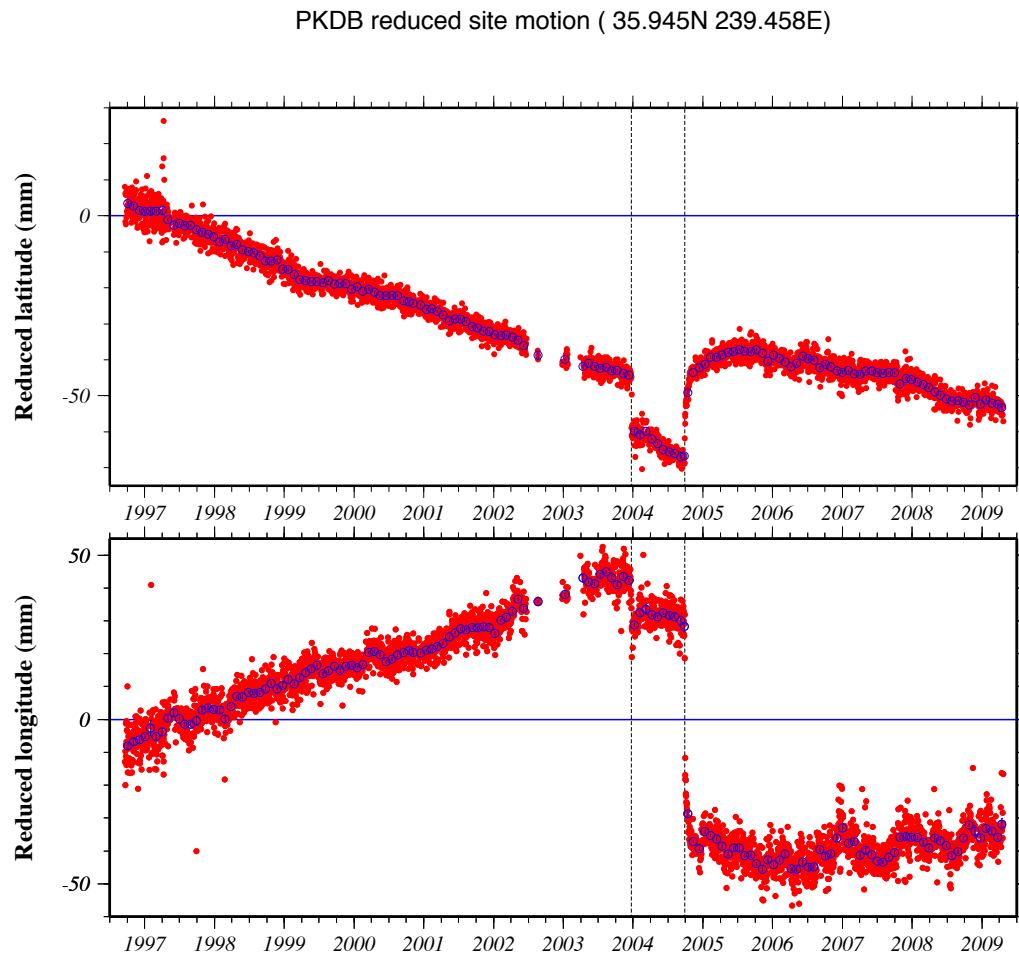

Figure 7: Uncorrected north and east movements of station PKDB adjacent to the Parkfield segment of the San Andreas fault in millimeters from 1996 to mid-2009 after removal of Pacific plate motion. Dotted vertical lines indicate the times of the Dec. 22, 2003 San Simeon and Sept. 28, 2004 Parkfield earthquakes. Red and blue circles show daily and weekly station position estimates, respectively.

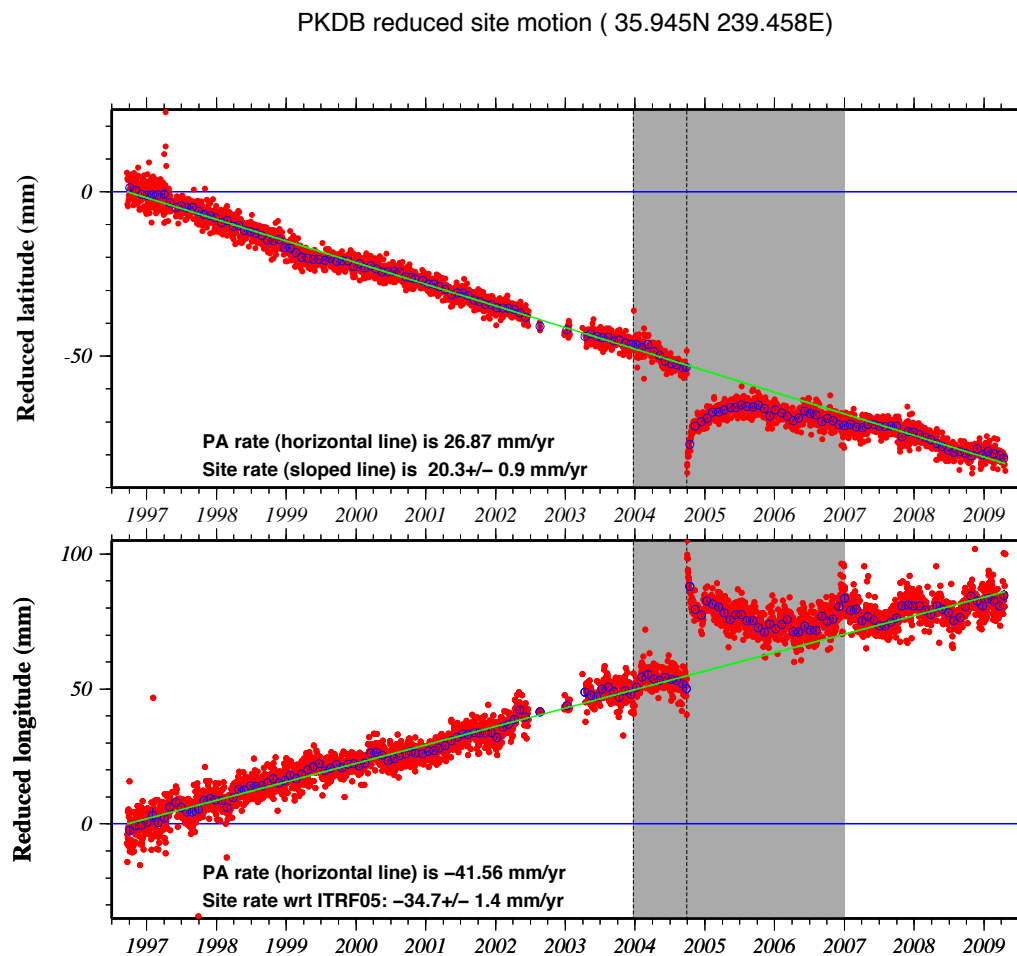

Figure 8: Linear regression of daily stations coordinates for station PKDB adjacent to the Parkfield segment to find best-fitting slope, intercept, and offsets for the 2003 San Simeon and 2004 Parkfield earthquakes. Pacific plate motion is removed from the station coordinates. Shaded region indicates station positions that are excluded from the determination of the best-fitting slope and intercept. Red and blue circles show daily and weekly station position estimates, respectively. Dotted vertical lines indicate the times of the Dec. 22, 2003 San Simeon and Sept. 28, 2004 Parkfield earthquakes.

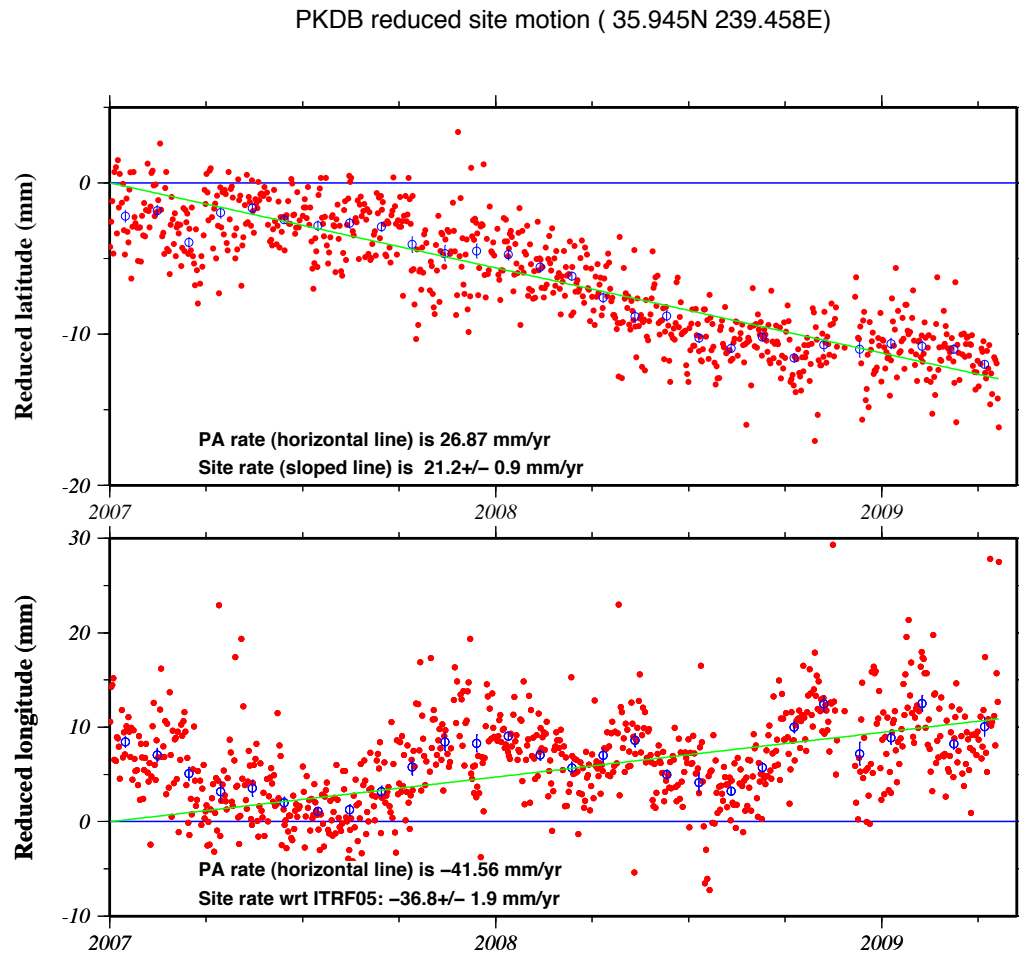

Figure 9: Linear regression of daily station coordinates for the period Jan. 1, 2007 to mid-2009 for station PKDB near Parkfield to find best-fitting slope and intercept. Pacific plate motion is removed from the station coordinates. Red and blue circles show daily and weekly station position estimates, respectively.

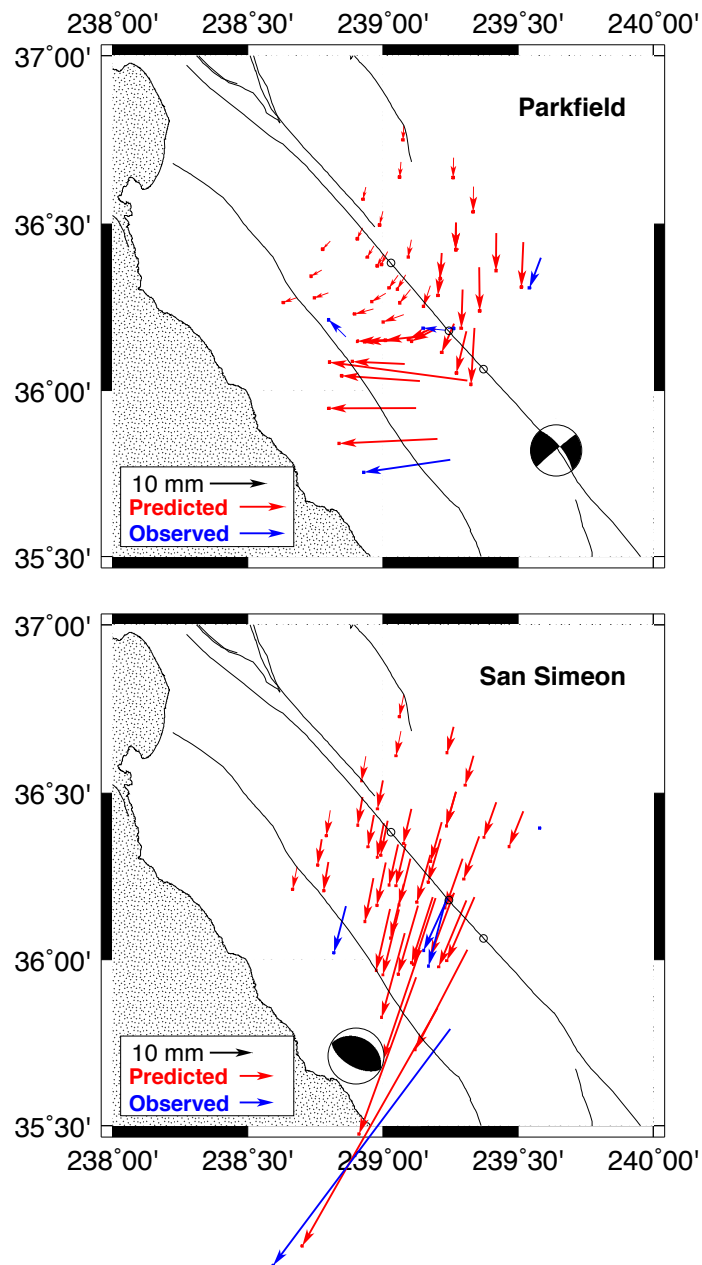

Figure 10: *Upper* - Combined coseismic and postseismic displacement for the 2004 Parkfield earthquake predicted by the best-fitting elastic half-space model of Johanson et al. (2006) (red) and coseismic displacements (blue) measured at continuous stations along the central creeping segment of the San Andreas fault. Displacements are predicted at the locations of all the campaign stations included in the study area. *Lower* - Combined coseismic and postseismic displacement for the 2003 San Simeon earthquake predicted by the best-fitting elastic half-space model of Rolandone et al. (2006) (red) and coseismic displacements (blue) measured at the same four continuous stations.

Table 1: GPS station information: Sierra Nevada-Great Valley block

| Site code | Lat. °N | Long. °W | $V_e$ mm yr <sup>-1</sup> | $V_n$ mm yr <sup>-1</sup> | Corr. coeff. | Station days | Time yrs | First obs. |
|-----------|---------|----------|---------------------------|---------------------------|--------------|--------------|----------|------------|
| CHO1      | 39.433  | 121.665  | -22.7±0.5                 | -4.5±0.4                  | -0.11        | 2704         | 8.5      | 1999.54    |
| CMBB      | 38.034  | 120.386  | -22.5±0.6                 | -3.1±0.4                  | -0.18        | 4697         | 15.4     | 1993.94    |
| CNDR      | 37.896  | 121.278  | -24.1±1.2                 | -2.8±0.7                  | -0.28        | 1494         | 6.9      | 1999.29    |
| LNC1      | 38.847  | 121.350  | -22.7±0.5                 | -4.3±0.4                  | -0.09        | 1853         | 5.7      | 2003.63    |
| LNC2      | 38.847  | 121.351  | -22.8±0.5                 | -4.1±0.4                  | -0.11        | 363          | 5.7      | 2003.63    |
| MUSB      | 37.170  | 119.309  | -22.0±0.4                 | -2.1±0.4                  | 0.14         | 3514         | 11.5     | 1997.85    |
| ORVB      | 39.555  | 121.500  | -22.2±0.3                 | -4.6±0.3                  | 0.04         | 4067         | 12.5     | 1996.89    |
| SUTB      | 39.206  | 121.821  | -22.5±0.4                 | -4.7±0.3                  | -0.00        | 3670         | 12.1     | 1997.24    |
| UCD1      | 38.536  | 121.751  | -22.5±0.4                 | -3.8±0.3                  | 0.06         | 3229         | 13.0     | 1996.38    |
| P140      | 38.829  | 120.693  | -21.9±0.8                 | -4.2±0.7                  | -0.08        | 974          | 2.8      | 2006.55    |
| P141      | 39.047  | 120.386  | -21.7±1.0                 | -3.9±0.8                  | 0.20         | 534          | 2.6      | 2006.80    |
| P143      | 38.760  | 119.765  | -22.4±1.2                 | -4.0±0.9                  | -0.02        | 253          | 1.6      | 2007.72    |
| P144      | 39.467  | 120.893  | -22.3±0.9                 | -4.8±0.9                  | -0.05        | 545          | 1.5      | 2007.82    |
| P146      | 39.338  | 120.537  | -22.1±0.7                 | -4.3±0.7                  | -0.08        | 880          | 2.7      | 2006.63    |
| P208      | 39.109  | 122.304  | -22.9±0.7                 | -5.3±0.6                  | 0.01         | 1122         | 3.1      | 2006.20    |
| P259      | 37.433  | 121.101  | -22.2±0.7                 | -3.2±0.6                  | -0.02        | 1342         | 3.8      | 2005.57    |
| P260      | 37.711  | 121.084  | -23.3±0.8                 | -4.2±0.7                  | -0.03        | 823          | 2.4      | 2005.56    |
| P265      | 38.530  | 121.954  | -22.9±0.7                 | -4.2±0.6                  | -0.17        | 1276         | 3.7      | 2005.65    |
| P267      | 38.380  | 121.823  | -22.2±0.9                 | -3.7±0.8                  | 0.43         | 1385         | 4.1      | 2005.26    |
| P268      | 38.474  | 121.646  | -24.7±0.9                 | -4.4±0.5                  | -0.16        | 1439         | 4.1      | 2005.27    |
| P270      | 39.244  | 122.055  | -23.0±0.6                 | -5.6±0.6                  | 0.03         | 1253         | 4.0      | 2005.38    |
| P271      | 38.657  | 121.715  | -23.6±0.6                 | -4.8±0.5                  | -0.10        | 1758         | 4.9      | 2004.44    |
| P272      | 39.146  | 121.943  | -22.7±0.7                 | -5.8±0.7                  | 0.12         | 1263         | 3.5      | 2005.82    |
| P273      | 38.116  | 121.388  | -22.9±1.1                 | -5.2±0.7                  | -0.09        | 1265         | 3.5      | 2005.82    |
| P274      | 38.283  | 121.461  | -24.9±1.2                 | -6.1±1.0                  | 0.02         | 1263         | 3.5      | 2005.82    |
| P275      | 38.322  | 121.215  | -23.1±0.8                 | -4.1±0.7                  | -0.07        | 1020         | 2.8      | 2006.54    |
| P276      | 38.645  | 121.095  | -23.1±0.6                 | -4.5±0.6                  | -0.08        | 1223         | 3.5      | 2005.88    |
| P305      | 37.352  | 120.197  | -22.7±0.6                 | -3.2±0.5                  | -0.12        | 1359         | 3.8      | 2005.56    |
| P306      | 37.795  | 120.644  | -23.4±0.8                 | -3.5±0.6                  | -0.20        | 995          | 2.8      | 2006.53    |
| P309      | 38.090  | 120.951  | -23.7±0.7                 | -3.6±0.6                  | -0.08        | 1147         | 3.2      | 2006.13    |
| P310      | 38.736  | 120.334  | -21.8±0.8                 | -4.2±0.7                  | 0.01         | 919          | 2.8      | 2006.56    |
| P725      | 37.089  | 119.746  | -22.6±0.8                 | -1.9±0.7                  | -0.08        | 718          | 2.1      | 2007.25    |

North and east velocity components  $V_n$  and  $V_e$  in units of mm yr<sup>-1</sup>, relative to ITRF2005. The correlation coefficient specifies the correlation between the north and east velocity variances and should be used to reconstruct their covariance. Station days indicates the number of days used to estimate a station's velocity. Time specifies the interval in years spanned by the GPS data, beginning with the time of the first observation used to define the time series. Corrections for the motion of the ITRF2005 origin relative to Earth's center-of-mass have not been made to these velocities. Station velocities are from GIPSY analysis of GPS code-phase data at the University of Wisconsin-Madison, current through May 10, 2009.

Table 2: GPS station information: Pacific plate

| Site<br>code | Lat.<br>°N | Long.<br>°E | $V_e$<br>mm yr <sup>-1</sup> | $V_n$<br>mm yr <sup>-1</sup> | Corr.<br>coeff. | Station<br>days | Time<br>yrs | First<br>obs. |
|--------------|------------|-------------|------------------------------|------------------------------|-----------------|-----------------|-------------|---------------|
| 1098         | 24.290     | 153.979     | -71.7±0.7                    | 24.0±0.5                     | 0.12            | 1916            | 6.4         | 2002.94       |
| ASPA         | -14.326    | 189.278     | -64.2±0.7                    | 33.8±0.5                     | -0.15           | 2448            | 7.7         | 2001.61       |
| CHAT         | -43.956    | 183.434     | -40.5±0.5                    | 33.3±0.4                     | 0.02            | 4862            | 13.6        | 1995.76       |
| CKIS         | -21.201    | 200.199     | -62.0±0.5                    | 34.4±0.4                     | -0.12           | 2536            | 7.7         | 2001.69       |
| CLAR         | 18.341     | 245.265     | -58.2±2.8                    | 23.2±2.4                     | 0.00            | 25              | 3.1         | 1997.85       |
| FALE         | -13.832    | 188.000     | -64.5±0.7                    | 33.1±0.5                     | -0.06           | 1475            | 10.4        | 1999.00       |
| GUAX         | 28.884     | 241.710     | -46.7±0.7                    | 24.7±0.6                     | -0.07           | 942             | 4.2         | 2001.05       |
| HILO         | 19.719     | 204.947     | -63.0±0.4                    | 35.6±0.4                     | 0.03            | 2806            | 10.4        | 1999.00       |
| HNLC         | 21.303     | 202.135     | -62.9±0.5                    | 34.7±0.4                     | 0.12            | 2964            | 10.4        | 1999.00       |
| KIRI         | 1.355      | 172.923     | -67.9±0.6                    | 31.0±0.5                     | 0.10            | 2227            | 6.8         | 2002.58       |
| KOK1         | 21.984     | 200.242     | -62.1±0.4                    | 35.2±0.4                     | 0.04            | 3856            | 11.7        | 1996.10       |
| KOKB         | 22.126     | 200.335     | -60.8±0.6                    | 34.2±0.4                     | 0.11            | 5279            | 16.3        | 1993.02       |
| KWJ1         | 8.722      | 167.730     | -69.3±1.0                    | 29.4±0.8                     | 0.02            | 1796            | 6.3         | 1996.21       |
| MAJB         | 7.119      | 171.365     | -70.1±1.5                    | 30.1±0.9                     | 0.05            | 607             | 2.0         | 2007.39       |
| MARC         | 24.290     | 153.979     | -72.8±1.0                    | 23.1±1.0                     | -0.01           | 1555            | 4.8         | 1995.54       |
| MAUI         | 20.707     | 203.743     | -62.2±0.5                    | 34.7±0.3                     | 0.08            | 3232            | 10.4        | 1999.00       |
| MKEA         | 19.801     | 204.544     | -64.1±0.5                    | 35.2±0.4                     | -0.05           | 4349            | 12.6        | 1996.75       |
| MAJU         | 7.119      | 171.365     | -70.1±1.3                    | 29.9±0.9                     | 0.04            | 622             | 2.0         | 2007.39       |
| NAUR         | -0.552     | 166.926     | -67.1±0.6                    | 29.2±0.5                     | 0.10            | 1612            | 5.9         | 2003.49       |
| PAMA         | -17.567    | 210.425     | -62.9±1.7                    | 29.2±1.8                     | 0.02            | 757             | 4.2         | 1993.00       |
| POHN         | 6.960      | 158.210     | -69.1±0.9                    | 25.2±0.8                     | 0.08            | 1979            | 6.0         | 2003.33       |
| SAMO         | -13.849    | 188.262     | -65.0±0.9                    | 33.2±0.4                     | -0.03           | 2500            | 7.9         | 2001.50       |
| SOCC         | 18.728     | 249.055     | -54.2±0.7                    | 21.0±0.9                     | 0.00            | 40              | 7.3         | 1997.84       |
| TAHT         | -17.577    | 210.394     | -64.9±1.1                    | 33.6±0.6                     | -0.03           | 1493            | 5.3         | 2004.00       |
| THTI         | -17.577    | 210.394     | -65.7±0.7                    | 34.2±0.4                     | -0.11           | 3354            | 10.9        | 1998.42       |
| TRUK         | 7.447      | 151.887     | -70.0±1.2                    | 24.5±0.5                     | 0.07            | 1150            | 6.8         | 1995.93       |
| TUVA         | -8.525     | 179.197     | -64.1±0.7                    | 32.1±0.4                     | 0.06            | 2281            | 7.4         | 2001.91       |

Information about the contents of each column is given in the footnotes for Table 1.



Table 3: GPS station information: Deforming region

| Site<br>code | Lat.<br>°N | Long.<br>°W | $V_e$<br>mm yr <sup>-1</sup> | $V_n$<br>mm yr <sup>-1</sup> | Corr.<br>coeff. | Station<br>days | Time<br>yrs | First<br>obs. |
|--------------|------------|-------------|------------------------------|------------------------------|-----------------|-----------------|-------------|---------------|
| 0508         | 35.855     | 120.799     | -44.0±3.3                    | 24.7±3.6                     | 0.00            | 13              | 3.0         | 2004.54       |
| 0509         | 35.992     | 121.484     | -35.9±1.4                    | 23.7±1.4                     | 0.00            | 7               | 10.4        | 1994.17       |
| 05QJ         | 35.948     | 120.878     | -41.9±3.2                    | 23.7±3.0                     | 0.00            | 15              | 3.0         | 2004.54       |
| 05RH         | 36.049     | 120.965     | -40.6±1.4                    | 20.7±1.0                     | 0.00            | 13              | 2.8         | 2004.74       |
| 05SH         | 36.153     | 120.973     | -42.6±2.2                    | 23.9±1.5                     | 0.00            | 15              | 4.5         | 2003.05       |
| 05SK         | 36.178     | 120.691     | -19.2±2.4                    | 0.1±1.7                      | 0.00            | 21              | 4.5         | 2003.04       |
| 05UH         | 36.410     | 120.996     | -24.8±0.9                    | -1.1±0.6                     | 0.00            | 12              | 13.9        | 1993.66       |
| 05WF         | 36.696     | 121.270     | -29.1±4.1                    | 7.3±3.4                      | 0.00            | 4               | 2.7         | 2004.87       |
| 05YF         | 36.793     | 121.325     | -21.5±4.5                    | -0.5±2.3                     | 0.00            | 4               | 2.7         | 2004.87       |
| AKRS         | 36.304     | 120.706     | -21.0±2.5                    | -3.8±1.5                     | 0.00            | 13              | 4.1         | 2003.40       |
| ALVS         | 36.363     | 121.226     | -39.8±2.2                    | 21.2±1.3                     | 0.00            | 14              | 4.5         | 2003.03       |
| BITT         | 36.417     | 120.982     | -23.4±2.4                    | -0.7±1.6                     | 0.00            | 15              | 4.1         | 2003.38       |
| BLAN         | 35.665     | 121.284     | -38.5±0.4                    | 25.9±0.5                     | 0.00            | 44              | 10.1        | 1994.18       |
| CALL         | 36.610     | 121.064     | -19.9±0.8                    | -2.1±0.6                     | 0.34            | 1030            | 4.8         | 2004.57       |
| CAND         | 35.939     | 120.434     | -23.6±1.6                    | 7.7±2.1                      | -0.85           | 3019            | 9.7         | 1999.63       |
| CANX         | 36.413     | 120.782     | -21.5±1.2                    | -1.1±0.7                     | 0.00            | 16              | 8.6         | 1998.88       |
| CARR         | 35.888     | 120.431     | -33.1±0.8                    | 17.8±0.4                     | -0.08           | 2810            | 8.9         | 1994.41       |
| CHLN         | 36.448     | 121.195     | -39.6±1.4                    | 22.9±0.8                     | 0.00            | 6               | 8.7         | 1998.88       |
| CRBT         | 35.792     | 120.751     | -38.6±0.6                    | 21.7±0.5                     | 0.32            | 2372            | 7.7         | 2001.70       |
| CRVO         | 36.445     | 120.481     | -20.2±2.4                    | 0.2±1.2                      | 0.00            | 5               | 5.7         | 1998.88       |
| CVM1         | 36.473     | 120.580     | -20.7±2.5                    | -0.9±1.5                     | 0.00            | 5               | 5.7         | 1998.88       |
| DTOG         | 36.113     | 120.585     | -28.1±2.6                    | -4.5±2.1                     | 0.00            | 12              | 4.1         | 2003.40       |
| EADE         | 36.081     | 120.920     | -43.4±2.5                    | 22.1±2.0                     | 0.00            | 14              | 4.1         | 2003.40       |
| GR8V         | 36.399     | 120.416     | -22.0±0.8                    | -2.8±0.5                     | 0.27            | 2174            | 6.1         | 2003.04       |
| GRIG         | 36.029     | 120.864     | -45.0±2.5                    | 22.8±2.4                     | 0.00            | 16              | 4.0         | 2003.41       |
| GRSW         | 36.503     | 120.729     | -20.0±1.7                    | -4.0±1.1                     | 0.00            | 15              | 6.1         | 1998.88       |
| HEPS         | 36.315     | 120.825     | -20.8±2.0                    | -0.5±1.2                     | 0.00            | 5               | 5.7         | 1998.88       |
| HNDZ         | 36.363     | 120.786     | -20.5±2.7                    | -2.1±1.4                     | 0.00            | 11              | 4.1         | 2003.40       |
| HOGS         | 35.867     | 120.479     | -34.7±1.3                    | 19.3±1.3                     | -0.63           | 1353            | 4.7         | 2001.53       |
| HOME         | 36.293     | 120.989     | -40.4±2.5                    | 21.1±1.5                     | 0.00            | 15              | 4.1         | 2003.38       |
| HUNT         | 35.881     | 120.402     | -25.8±2.3                    | 7.2±2.4                      | -0.92           | 2453            | 7.7         | 2001.60       |
| LAND         | 35.900     | 120.473     | -34.2±1.5                    | 19.1±1.4                     | -0.86           | 3052            | 9.7         | 1999.65       |
| LEY_         | 36.453     | 120.894     | -21.5±1.3                    | -1.0±0.9                     | 0.00            | 9               | 8.7         | 1998.88       |
| LOWS         | 35.829     | 120.594     | -37.4±0.6                    | 21.0±0.5                     | -0.24           | 2441            | 7.8         | 2001.59       |
| MADS         | 36.163     | 120.870     | -42.2±2.3                    | 21.1±1.3                     | 0.00            | 12              | 4.4         | 2003.05       |
| MASW         | 35.833     | 120.443     | -35.3±1.0                    | 18.5±1.6                     | -0.73           | 2437            | 7.8         | 2001.60       |
| MEE1         | 36.187     | 120.759     | -23.1±0.6                    | -1.5±0.5                     | -0.06           | 2098            | 6.3         | 2003.03       |
| MEE2         | 36.181     | 120.767     | -40.8±0.6                    | 21.1±0.5                     | -0.21           | 2033            | 6.3         | 2003.03       |
| MEE3         | 36.186     | 120.806     | -41.4±2.3                    | 19.4±1.6                     | 0.00            | 12              | 4.4         | 2003.05       |
| MIDA         | 35.922     | 120.459     | -22.5±1.6                    | 8.8±2.8                      | -0.78           | 3045            | 9.7         | 1999.65       |
| MNMC         | 35.970     | 120.434     | -20.9±0.9                    | 5.4±2.0                      | -0.64           | 2454            | 7.8         | 2001.59       |
| NINO         | 36.246     | 121.035     | -40.5±2.3                    | 22.5±1.4                     | 0.00            | 15              | 4.4         | 2003.06       |
| NWID         | 36.419     | 120.673     | -21.3±2.6                    | -2.1±1.4                     | 0.00            | 11              | 4.1         | 2003.41       |

| Site<br>code | Lat.<br>°N | Long.<br>°W | $V_e$<br>mm yr <sup>-1</sup> | $V_n$<br>mm yr <sup>-1</sup> | Corr.<br>coeff. | Station<br>days | Time<br>yrs | First<br>obs. |
|--------------|------------|-------------|------------------------------|------------------------------|-----------------|-----------------|-------------|---------------|
| P067         | 35.552     | 121.003     | -39.5±0.8                    | 26.6±1.5                     | 0.53            | 1819            | 5.3         | 2004.03       |
| P171         | 36.486     | 121.793     | -40.2±0.7                    | 24.5±0.5                     | 0.22            | 1640            | 4.7         | 2004.68       |
| P172         | 36.228     | 121.767     | -42.6±1.4                    | 24.7±1.1                     | -0.12           | 379             | 1.1         | 2008.31       |
| P173         | 35.946     | 121.290     | -39.9±1.4                    | 24.6±1.2                     | 0.22            | 282             | 0.8         | 2008.58       |
| P174         | 36.302     | 121.051     | -40.2±0.8                    | 22.3±0.8                     | 0.06            | 817             | 2.3         | 2007.07       |
| P175         | 36.426     | 121.135     | -40.8±0.8                    | 22.5±0.6                     | -0.10           | 1063            | 3.0         | 2006.38       |
| P180         | 36.293     | 121.403     | -39.2±1.1                    | 22.4±0.9                     | -0.11           | 833             | 2.3         | 2007.06       |
| P210         | 36.816     | 121.732     | -40.5±0.6                    | 21.0±0.6                     | -0.00           | 1393            | 4.0         | 2005.40       |
| P211         | 36.879     | 121.698     | -39.2±0.8                    | 21.1±0.8                     | -0.01           | 703             | 2.1         | 2007.22       |
| P216         | 37.002     | 121.726     | -35.5±0.8                    | 16.3±0.8                     | -0.01           | 773             | 2.1         | 2007.22       |
| P231         | 36.622     | 121.905     | -40.3±1.0                    | 24.2±1.0                     | -0.35           | 882             | 2.4         | 2006.92       |
| P232         | 36.724     | 121.579     | -40.1±0.8                    | 22.6±0.7                     | -0.08           | 770             | 2.1         | 2007.23       |
| P233         | 36.800     | 121.420     | -29.4±0.8                    | 13.1±0.7                     | -0.00           | 981             | 2.7         | 2006.64       |
| P234         | 36.859     | 121.591     | -38.1±0.8                    | 19.9±0.7                     | -0.04           | 1016            | 2.8         | 2006.53       |
| P235         | 36.814     | 121.542     | -38.7±0.8                    | 22.1±0.8                     | -0.04           | 692             | 1.9         | 2007.45       |
| P236         | 36.904     | 121.554     | -34.4±0.7                    | 13.7±0.6                     | -0.08           | 1133            | 3.6         | 2005.80       |
| P237         | 36.637     | 121.387     | -39.5±0.8                    | 22.2±0.7                     | -0.09           | 808             | 2.2         | 2007.13       |
| P238         | 36.849     | 121.453     | -28.3±1.1                    | 11.9±0.8                     | -0.38           | 1116            | 3.1         | 2006.27       |
| P240         | 37.008     | 121.542     | -32.1±0.7                    | 11.5±0.6                     | 0.09            | 1275            | 4.0         | 2005.40       |
| P242         | 36.954     | 121.463     | -32.0±0.8                    | 10.2±1.1                     | -0.24           | 1537            | 4.4         | 2004.96       |
| P243         | 36.918     | 121.335     | -25.3±0.8                    | -2.4±0.8                     | -0.03           | 692             | 2.0         | 2007.38       |
| P244         | 37.011     | 121.355     | -26.0±0.7                    | -1.9±0.6                     | -0.07           | 1240            | 3.5         | 2005.88       |
| P247         | 36.560     | 121.188     | -39.7±1.0                    | 22.6±0.7                     | 0.12            | 1061            | 3.0         | 2006.40       |
| P250         | 36.950     | 121.268     | -24.7±0.8                    | -1.4±0.7                     | -0.03           | 710             | 2.0         | 2007.37       |
| P251         | 36.811     | 121.348     | -24.2±0.7                    | 1.8±0.6                      | 0.06            | 975             | 3.1         | 2006.27       |
| P252         | 37.170     | 121.058     | -23.4±0.6                    | -3.1±0.6                     | -0.08           | 1169            | 3.5         | 2005.86       |
| P259         | 37.433     | 121.101     | -22.2±0.7                    | -3.2±0.6                     | -0.02           | 1342            | 3.8         | 2005.57       |
| P278         | 35.711     | 121.061     | -40.7±0.7                    | 20.7±0.9                     | -0.00           | 1751            | 5.3         | 2004.09       |
| P279         | 35.791     | 121.062     | -40.7±0.9                    | 22.1±0.8                     | 0.05            | 618             | 1.7         | 2007.64       |
| P280         | 35.544     | 120.348     | -36.1±0.9                    | 19.0±0.6                     | 0.02            | 1039            | 2.9         | 2006.47       |
| P281         | 35.841     | 120.389     | -33.1±2.6                    | 20.0±2.8                     | -0.87           | 1365            | 4.5         | 2004.86       |
| P282         | 35.838     | 120.345     | -24.6±2.8                    | 6.3±1.0                      | -0.69           | 1420            | 4.5         | 2004.84       |
| P283         | 35.807     | 120.285     | -24.7±1.7                    | 7.0±0.5                      | -0.28           | 1587            | 4.5         | 2004.84       |
| P284         | 35.933     | 120.907     | -39.6±0.7                    | 20.9±0.6                     | 0.09            | 1520            | 4.2         | 2005.10       |
| P285         | 36.417     | 120.981     | -23.3±0.8                    | 1.0±0.6                      | -0.03           | 1012            | 2.8         | 2006.53       |
| P286         | 36.516     | 120.853     | -21.7±0.9                    | -1.1±0.9                     | -0.07           | 618             | 1.7         | 2007.64       |
| P287         | 36.025     | 120.698     | -40.3±0.6                    | 20.4±0.6                     | 0.03            | 1476            | 4.3         | 2005.10       |
| P288         | 36.140     | 120.879     | -40.6±0.7                    | 21.8±0.6                     | -0.12           | 1138            | 3.2         | 2006.14       |
| P289         | 36.107     | 120.749     | -40.1±0.8                    | 21.4±0.7                     | -0.01           | 831             | 2.3         | 2007.07       |
| P290         | 36.179     | 120.728     | -21.1±0.7                    | -0.5±0.6                     | -0.01           | 1141            | 3.2         | 2006.15       |
| P291         | 35.923     | 120.645     | -37.9±0.8                    | 21.5±0.8                     | -0.06           | 626             | 1.7         | 2007.64       |
| P292         | 36.008     | 120.475     | -19.7±1.3                    | 6.3±1.3                      | 0.22            | 451             | 1.2         | 2008.11       |
| P293         | 36.089     | 120.543     | -19.7±0.9                    | 1.9±0.7                      | -0.05           | 905             | 2.6         | 2006.76       |
| P294         | 36.123     | 120.440     | -21.0±0.6                    | 1.4±0.6                      | 0.01            | 1069            | 3.0         | 2006.38       |
| P295         | 35.697     | 120.842     | -39.1±0.5                    | 20.7±0.6                     | 0.17            | 1771            | 5.3         | 2004.03       |

| Site<br>code | Lat.<br>°N | Long.<br>°W | $V_e$<br>mm yr <sup>-1</sup> | $V_n$<br>mm yr <sup>-1</sup> | Corr.<br>coeff. | Station<br>days | Time<br>yrs | First<br>obs. |
|--------------|------------|-------------|------------------------------|------------------------------|-----------------|-----------------|-------------|---------------|
| P296         | 36.052     | 120.364     | -20.2±0.8                    | 2.6±0.7                      | 0.12            | 920             | 2.6         | 2006.77       |
| P297         | 35.974     | 120.552     | -38.1±0.7                    | 21.5±0.7                     | -0.26           | 1087            | 3.6         | 2005.80       |
| P298         | 36.016     | 120.294     | -21.0±0.7                    | 2.6±0.6                      | 0.32            | 1187            | 3.4         | 2006.00       |
| P300         | 36.304     | 120.277     | -21.0±1.0                    | 0.4±1.0                      | 0.56            | 1508            | 4.4         | 2004.95       |
| P301         | 36.806     | 120.743     | -22.1±0.6                    | -3.1±0.5                     | -0.05           | 1568            | 4.4         | 2004.96       |
| P302         | 36.635     | 120.619     | -20.5±0.8                    | -1.5±0.6                     | 0.24            | 1399            | 4.4         | 2004.96       |
| P303         | 37.054     | 120.705     | -23.5±0.7                    | -2.9±0.6                     | 0.01            | 1268            | 3.8         | 2005.57       |
| P304         | 36.739     | 120.357     | -22.8±0.6                    | -2.6±0.6                     | 0.16            | 1616            | 5.0         | 2004.33       |
| P514         | 35.011     | 120.410     | -40.5±0.8                    | 22.2±0.7                     | 0.36            | 993             | 2.8         | 2006.57       |
| P516         | 35.106     | 120.383     | -39.4±0.9                    | 22.1±0.7                     | 0.23            | 1062            | 3.3         | 2006.10       |
| P523         | 35.304     | 120.860     | -40.3±0.7                    | 23.9±0.6                     | -0.07           | 1118            | 3.3         | 2006.09       |
| P524         | 35.166     | 120.591     | -40.3±0.9                    | 23.1±0.7                     | 0.03            | 725             | 2.0         | 2007.05       |
| P526         | 35.636     | 120.870     | -38.5±0.7                    | 20.0±0.8                     | 0.13            | 1815            | 5.3         | 2004.03       |
| P527         | 35.754     | 120.605     | -37.0±0.8                    | 20.3±0.7                     | -0.06           | 973             | 2.7         | 2006.66       |
| P529         | 35.440     | 120.354     | -36.2±0.8                    | 20.4±0.7                     | 0.06            | 936             | 2.9         | 2006.47       |
| P530         | 35.625     | 120.480     | -36.5±0.6                    | 21.9±0.6                     | 0.15            | 1371            | 3.8         | 2005.52       |
| P531         | 35.793     | 120.537     | -37.0±0.8                    | 20.7±0.7                     | -0.04           | 834             | 2.3         | 2007.05       |
| P532         | 35.634     | 120.267     | -33.4±0.7                    | 16.1±0.6                     | 0.24            | 1643            | 4.6         | 2004.77       |
| P533         | 35.748     | 120.371     | -33.4±0.9                    | 18.3±0.6                     | -0.03           | 1061            | 3.0         | 2006.36       |
| P535         | 35.235     | 120.101     | -37.0±0.8                    | 17.5±0.7                     | 0.05            | 939             | 2.6         | 2006.72       |
| P536         | 35.280     | 120.025     | -35.6±0.8                    | 16.0±0.6                     | -0.03           | 1077            | 3.0         | 2006.34       |
| P537         | 35.317     | 119.935     | -33.8±0.8                    | 13.2±0.6                     | 0.06            | 1080            | 3.0         | 2006.34       |
| P538         | 35.534     | 120.112     | -32.6±0.8                    | 12.9±0.6                     | -0.02           | 1075            | 3.0         | 2006.34       |
| P539         | 35.703     | 120.182     | -28.1±1.0                    | 8.2±0.5                      | -0.09           | 1436            | 4.6         | 2004.75       |
| P540         | 35.801     | 120.131     | -24.8±0.6                    | 4.2±0.6                      | -0.00           | 1061            | 3.2         | 2006.10       |
| P541         | 35.687     | 120.001     | -24.9±0.6                    | 4.8±0.5                      | -0.05           | 1130            | 3.8         | 2005.51       |
| P542         | 35.689     | 120.293     | -33.7±1.0                    | 15.3±0.9                     | 0.17            | 445             | 1.2         | 2008.13       |
| P543         | 35.319     | 119.713     | -27.8±0.9                    | 7.2±0.7                      | 0.19            | 1036            | 2.9         | 2006.47       |
| P544         | 35.731     | 119.738     | -21.0±0.7                    | 0.3±0.6                      | -0.11           | 1101            | 3.4         | 2005.95       |
| P545         | 35.500     | 119.536     | -23.7±1.1                    | 3.0±1.0                      | 0.25            | 548             | 1.5         | 2007.83       |
| P546         | 35.928     | 120.155     | -21.8±0.7                    | 3.2±0.6                      | -0.03           | 1152            | 3.3         | 2006.09       |
| P547         | 35.935     | 119.909     | -21.1±0.7                    | 2.1±0.7                      | 0.04            | 1095            | 3.4         | 2005.95       |
| P552         | 35.687     | 120.245     | -33.1±1.1                    | 13.9±1.0                     | 0.13            | 446             | 1.2         | 2008.12       |
| P564         | 35.623     | 119.349     | -25.4±1.1                    | 5.5±1.4                      | 0.09            | 884             | 2.5         | 2006.84       |
| P576         | 35.670     | 120.970     | -40.5±1.3                    | 21.0±2.3                     | 0.64            | 1643            | 5.3         | 2004.04       |
| P602         | 35.729     | 120.228     | -28.0±1.1                    | 8.8±1.0                      | 0.03            | 448             | 1.2         | 2008.12       |
| PANC         | 36.698     | 120.739     | -21.4±1.2                    | -1.8±0.7                     | 0.00            | 22              | 8.6         | 1998.88       |
| PFYF         | 36.202     | 120.736     | -22.7±0.8                    | -3.3±0.8                     | 0.00            | 17              | 4.4         | 2003.06       |
| PHEL         | 36.220     | 120.488     | -24.3±2.5                    | -4.8±1.4                     | 0.00            | 13              | 4.1         | 2003.40       |
| PKDB         | 35.945     | 120.542     | -34.7±1.4                    | 20.3±0.9                     | -0.78           | 4085            | 12.6        | 1996.72       |
| POMM         | 35.920     | 120.478     | -34.1±2.3                    | 17.6±1.3                     | -0.89           | 3123            | 9.7         | 1999.64       |
| QCYN         | 36.161     | 121.137     | -39.8±0.5                    | 22.3±0.5                     | 0.03            | 2231            | 6.3         | 2003.05       |
| RED_         | 36.685     | 120.934     | -21.5±1.6                    | -0.5±1.1                     | 0.00            | 8               | 8.7         | 1998.88       |
| RIST         | 36.304     | 120.898     | -40.4±2.4                    | 19.8±1.5                     | 0.00            | 14              | 4.1         | 2003.39       |
| RNCH         | 35.900     | 120.525     | -36.5±1.8                    | 20.1±1.2                     | -0.56           | 2413            | 7.8         | 2001.60       |

| Site<br>code | Lat.<br>°N | Long.<br>°W | $V_e$<br>mm yr <sup>-1</sup> | $V_n$<br>mm yr <sup>-1</sup> | Corr.<br>coeff. | Station<br>days | Time<br>yrs | First<br>obs. |
|--------------|------------|-------------|------------------------------|------------------------------|-----------------|-----------------|-------------|---------------|
| RNDA         | 36.279     | 121.318     | -40.3±2.4                    | 23.4±1.4                     | 0.00            | 14              | 4.1         | 2003.41       |
| SANS         | 36.434     | 121.034     | -40.4±2.5                    | 21.0±1.4                     | 0.00            | 13              | 4.1         | 2003.39       |
| SAOB         | 36.765     | 121.447     | -40.5±0.5                    | 23.8±0.5                     | -0.22           | 3674            | 11.8        | 1997.52       |
| SBEN         | 36.370     | 120.645     | -20.8±2.5                    | -5.1±1.3                     | 0.00            | 10              | 4.0         | 2003.42       |
| SERP         | 36.325     | 120.549     | -21.2±2.5                    | -4.1±2.2                     | 0.00            | 9               | 4.1         | 2003.42       |
| SHAD         | 36.030     | 120.682     | -42.6±1.5                    | 25.9±2.1                     | 0.00            | 13              | 8.7         | 1998.88       |
| SMOK         | 36.537     | 121.000     | -20.4±1.9                    | -1.6±1.3                     | 0.00            | 5               | 5.7         | 1998.88       |
| SPAR         | 36.151     | 120.940     | -42.2±2.3                    | 21.6±2.0                     | 0.00            | 13              | 4.4         | 2003.05       |
| STRO         | 36.188     | 120.662     | -21.9±2.3                    | -4.6±1.3                     | 0.00            | 13              | 4.4         | 2003.05       |
| SWTR         | 36.228     | 120.923     | -40.3±1.5                    | 22.2±1.2                     | 0.00            | 7               | 8.7         | 1998.88       |
| TBLP         | 35.917     | 120.360     | -25.2±1.3                    | 5.1±1.2                      | -0.60           | 2391            | 7.6         | 2001.74       |
| TIGA         | 36.794     | 120.923     | -22.1±1.4                    | -1.4±0.8                     | 0.00            | 9               | 8.7         | 1998.88       |
| TLY1         | 36.346     | 120.944     | -40.5±2.5                    | 20.9±1.5                     | 0.00            | 13              | 4.1         | 2003.39       |
| TLY2         | 36.347     | 120.916     | -21.9±2.4                    | -1.3±1.8                     | 0.00            | 14              | 4.1         | 2003.39       |
| TUMY         | 36.611     | 120.665     | -21.1±0.4                    | -2.4±0.4                     | 0.00            | 24              | 8.6         | 1998.88       |
| USLO         | 35.312     | 120.661     | -39.7±0.4                    | 24.2±0.4                     | 0.13            | 3034            | 8.6         | 2000.74       |
| WFLG         | 35.947     | 121.065     | -39.3±2.5                    | 21.2±2.6                     | 0.00            | 12              | 4.1         | 2003.41       |

Information about the contents of each column is given in the footnotes for Table 1.
